# Supplementary material for: Association betweenNFKB1−94ins/del ATTG Promoter Polymorphism and Cancer Susceptibility: An Updated Meta-Analysis
Source: Hindawi journal article supplement (doi:10.1155/2014/612972), 2014-01-01
Supplement: f1 [file 612972.f1.zip]

**Supplementary Table 1 Meta-analysis of the *NFKB1* -94ins/del ATTG promoter polymorphism and cancer risk among the studies which did not deviated from HWE**

| Variable        | <i>n</i> <sup>a</sup> | Cases / Controls | ins/ins versus del/del              |                           | ins/del versus del/del              |                           | ins/ins + ins/del vs. del/del (dominant) |                           | ins/ins vs. ins/del + del/del (recessive) |                           | ins allele vs. del allele           |                           |
|-----------------|-----------------------|------------------|-------------------------------------|---------------------------|-------------------------------------|---------------------------|------------------------------------------|---------------------------|-------------------------------------------|---------------------------|-------------------------------------|---------------------------|
|                 |                       |                  | OR (95% CI)                         | <i>I</i> <sup>2</sup> (%) | OR (95% CI)                         | <i>I</i> <sup>2</sup> (%) | OR (95% CI)                              | <i>I</i> <sup>2</sup> (%) | OR (95% CI)                               | <i>I</i> <sup>2</sup> (%) | OR (95% CI)                         | <i>I</i> <sup>2</sup> (%) |
| Total           | 15                    | 3968/6473        | <b>1.65 (1.17–2.32)<sup>b</sup></b> | 86.2                      | <b>1.28 (1.03–1.60)<sup>b</sup></b> | 70.5                      | <b>1.41 (1.09–1.83)<sup>b</sup></b>      | 81.2                      | <b>1.33 (1.08–1.63)<sup>b</sup></b>       | <b>80.7</b>               | <b>1.26 (1.07–1.49)<sup>b</sup></b> | 86.3                      |
| Cancer types    |                       |                  |                                     |                           |                                     |                           |                                          |                           |                                           |                           |                                     |                           |
| Bladder cancer  | 3                     | 1058/1175        | 1.07 (0.45–2.53) <sup>b</sup>       | 90.1                      | 1.00 (0.46–2.18) <sup>b</sup>       | 88.8                      | 1.04 (0.46–2.33) <sup>b</sup>            | 90.7                      | 1.04 (0.73–1.48) <sup>b</sup>             | 72.7                      | 1.03 (0.70–1.51) <sup>b</sup>       | 89.0                      |
| Ovarian Cancer  | 2                     | 366/444          | <b>2.57 (1.66–3.98)</b>             | 0                         | <b>1.88 (1.23–2.89)</b>             | 0                         | <b>2.17 (1.45–3.25)</b>                  | 0                         | <b>1.59 (1.19–2.11)</b>                   | 0                         | <b>1.55 (1.27–1.90)</b>             | 0                         |
| Oral Cancer     | 2                     | 674/721          | <b>2.10 (1.54–2.87)</b>             | 33.0                      | <b>1.42 (1.10–1.83)</b>             | 0                         | <b>1.59 (1.25–2.03)</b>                  | 3.9                       | <b>1.67 (1.29–2.17)</b>                   | 0                         | <b>1.43 (1.23–1.66)</b>             | 6.9                       |
| Prostate Cancer | 2                     | 451/477          | <b>1.59 (1.09–2.33)</b>             | 23.0                      | 1.28 (0.89–1.84)                    | 28.6                      | 1.40 (1.00–1.98)                         | 35.8                      | <b>1.33 (1.01–1.74)</b>                   | 0                         | <b>1.26 (1.05–1.52)</b>             | 0                         |
| Other Cancers   | 6                     | 1419/3656        | 1.66 (0.90–3.06) <sup>b</sup>       | 89.0                      | 1.19 (0.99–1.43)                    | 40.4                      | 1.39 (0.95–2.04) <sup>b</sup>            | 77.6                      | 1.35 (0.88–2.08) <sup>b</sup>             | 89.1                      | <b>1.26 (0.93–1.71)<sup>b</sup></b> | 90.0                      |
| Ethnicities     |                       |                  |                                     |                           |                                     |                           |                                          |                           |                                           |                           |                                     |                           |
| Asian           | 11                    | 2686/3380        | <b>2.05 (1.34–3.14)<sup>b</sup></b> | 85.6                      | <b>1.40 (1.03–1.91)<sup>b</sup></b> | 77.1                      | <b>1.62 (1.15–2.29)<sup>b</sup></b>      | 83.7                      | <b>1.56 (1.26–1.92)<sup>b</sup></b>       | 68.8                      | <b>1.41 (1.16–1.71)<sup>b</sup></b> | 83.9                      |
| Caucasian       | 4                     | 1282/3093        | 0.93 (0.65–1.32) <sup>b</sup>       | 64.7                      | 1.04 (0.85–1.27)                    | 0                         | 0.97 (0.81–1.17)                         | 33.8                      | 0.88 (0.68–1.14) <sup>b</sup>             | 68.6                      | 0.94 (0.78–1.13) <sup>b</sup>       | 70.2                      |

<sup>a</sup> Number of comparisons

<sup>b</sup> Random effects estimate

**Supplementary Table 2 Egger's linear regression test to measure the funnel plot asymmetric**

| Comparisons       | ins/ins versus del/del |                | ins/del versus del/del |                | ins/ins + ins/del vs. del/del |                | ins/ins vs. ins/del + del/del |                | ins allele vs. del allele |                |
|-------------------|------------------------|----------------|------------------------|----------------|-------------------------------|----------------|-------------------------------|----------------|---------------------------|----------------|
|                   | A (95% CI)             | <i>P</i> value | A (95% CI)             | <i>P</i> value | A (95% CI)                    | <i>P</i> value | A (95% CI)                    | <i>P</i> value | A (95% CI)                | <i>P</i> value |
| Total             | 7.06 (3.04–11.1)       | 0.002          | 4.08 (1.90–6.25)       | 0.001          | 5.27 (2.39–8.16)              | 0.001          | 4.66 (1.24–8.08)              | 0.010          | 5.48 (1.94–9.02)          | 0.004          |
| Cancer types      |                        |                |                        |                |                               |                |                               |                |                           |                |
| Bladder cancer    | 9.96 (-42.5–62.4)      | 0.250          | 8.01 (3.76–12.3)       | 0.027          | 9.14 (-12.6–30.9)             | 0.118          | 6.57 (-59.1–72.2)             | 0.424          | 10.0 (-38.2–58.2)         | 0.231          |
| Colorectal Cancer | 11.4 (-7.80–30.5)      | 0.125          | -6.03 (-21.7–9.62)     | 0.239          | 0.83 (-32.2–33.8)             | 0.924          | 8.66 (-7.39–24.7)             | 0.146          | 10.1 (-2.77–23.0)         | 0.078          |
| Ovarian Cancer    | -                      | -              | -                      | -              | -                             | -              | -                             | -              | -                         | -              |
| Oral Cancer       | -                      | -              | -                      | -              | -                             | -              | -                             | -              | -                         | -              |
| Prostate Cancer   | -                      | -              | -                      | -              | -                             | -              | -                             | -              | -                         | -              |
| Other Cancers     | 6.85 (0.89–12.8)       | 0.031          | 3.80 (0.80–6.81)       | 0.021          | 4.97 (1.05–8.89)              | 0.021          | 4.49 (-0.93–9.91)             | 0.089          | 4.66 (-0.23–9.55)         | 0.058          |
| Ethnicities       |                        |                |                        |                |                               |                |                               |                |                           |                |
| Asian             | 7.92 (3.06–12.8)       | 0.004          | 4.56 (1.44–7.70)       | 0.008          | 6.02 (2.09–9.95)              | 0.006          | 4.81 (1.59–8.03)              | 0.007          | 5.54 (1.54–9.54)          | 0.011          |
| Caucasian         | 4.67 (0.36–8.99)       | 0.039          | 3.11 (-0.04–6.27)      | 0.052          | 3.36 (-5.10–11.8)             | 0.354          | 3.91 (1.28–6.55)              | 0.012          | 4.47 (-0.66–9.60)         | 0.075          |

A: Y axle intercept

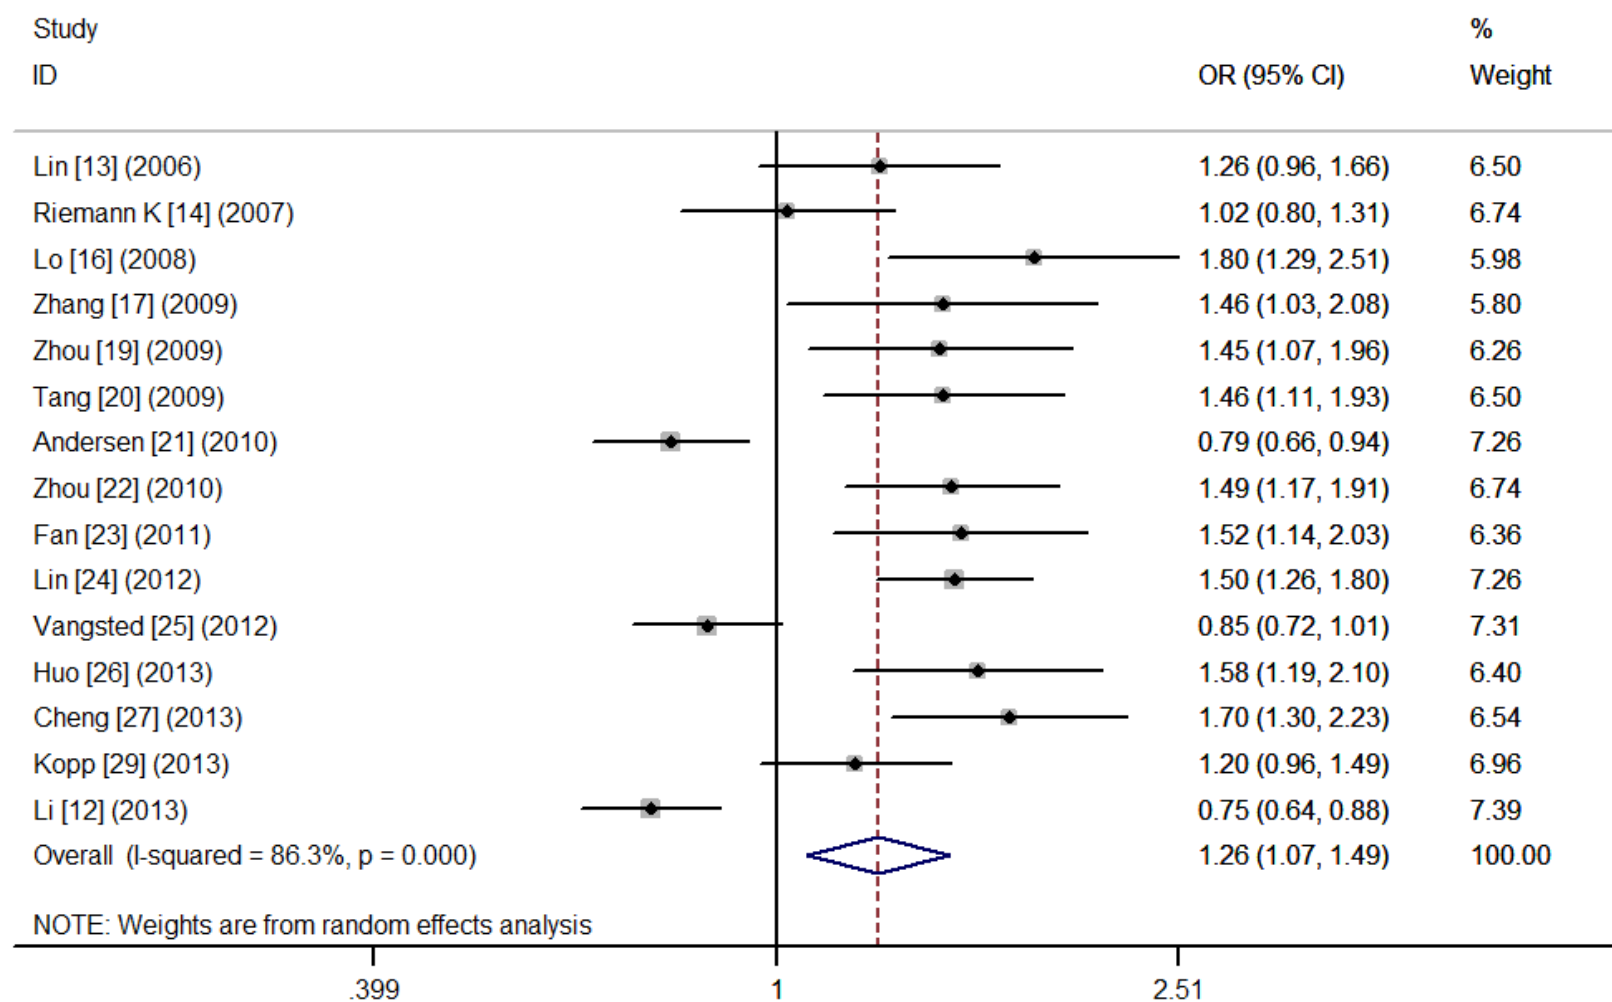

Supplementary Figure 1. Forest plot of cancer risk associated with NFKB1 promoter -94ins/del ATTG polymorphism (for Insertion allele vs. Deletion allele) among the studies which did not deviated from HWE
