# Supplementary material for: Association between NFKB1 −94ins/del ATTG Promoter Polymorphism and Cancer Susceptibility: An Updated Meta-Analysis
Source: Int J Genomics. 2014 May 7;2014:612972. doi: 10.1155/2014/612972 (PMC4033547; doi:10.1155/2014/612972)
Supplement: Supplementary file 1 — The meta-analysis result of the studies which did not deviated from HWE. [file 612972.f1.zip]

Archive with 2 entries (2 files):
- 612972.f1/manuscript_cfg_900205.pdf
- 612972.f1/Supplementary Figure 1.eps
